# Supplementary material
Source: PubMed Central journal article supplement (PMC3678760)
Supplement: NIHMS458479-supplement-01.pdf [file NIHMS458479-supplement-01.pdf]

## SUPPLEMENTARY DATA

### Steric analysis of epoxyalcohol and trihydroxy derivatives of 9-hydroperoxy-linoleic acid from hematin and enzymatic synthesis

by

Christopher P. Thomas, William E. Boeglin, Yoel Garcia-Diaz, Valerie B. O'Donnell, and Alan R. Brash

**Table S1.**  $^1\text{H}$  NMR spectrum of 9S,10S,13S-trihydroxyoctadecenoate methyl ester, DMP derivative. (Trihydroxy I, generated from the acid hydrolysis of 9S,10S-*trans*-epoxy-13S-hydroxy-octadec-11E-enoic acid)

**Table S2.**  $^1\text{H}$  NMR spectrum of 9S,12R,13S-trihydroxyoctadecenoate methyl ester, DMP derivative. (Trihydroxy IIa, generated from the acid hydrolysis of 9S,10S-*trans*-epoxy-13S-hydroxy-octadec-11E-enoic acid)

**Table S3.**  $^1\text{H}$  NMR spectrum of 9S,10R,13S-trihydroxyoctadecenoate methyl ester, DMP derivative. (Trihydroxy IIb, generated from the acid hydrolysis of 9S,10S-*trans*-epoxy-13S-hydroxy-octadec-11E-enoic acid)

**Table S4.**  $^1\text{H}$  NMR spectrum of 9S,12S,13S-trihydroxyoctadecenoate methyl ester, DMP derivative. (Trihydroxy III, pinellic acid, a minor acid hydrolysis product of 9S,10S-*trans*-epoxy-13S-hydroxyoctadec-11E-enoic acid)

**Table S5.**  $^1\text{H}$  NMR spectrum of 9S,12S,13S-trihydroxyoctadecenoate methyl ester, DMP derivative. (Pinellic acid generated from 9S-HPODE in beetroot extract)

**Table S6.**  $^1\text{H}$  NMR spectrum of 9R-hydroxy-10E-12R,13S-*cis*-epoxyoctadecenoate methyl ester. (Main epoxyalcohol generated by short (5 min) incubation of 9R-HPODE in beetroot)

**Table S7.**  $^1\text{H}$  NMR spectrum of 9R,12S,13S-trihydroxyoctadecenoate methyl ester, DMP derivative. (Main trihydroxy product of 60 min incubation of 9R-HPODE in beetroot)

**Table S8.**  $^1\text{H}$  NMR spectrum of 9-hydroxy-11E-13-oxo-octadecenoate methyl ester. (Major  $\delta$ -ketol formed during mild acid hydrolysis of 9S,10S-*trans*-epoxy-13S-hydroxy-octadec-11E-enoic acid).

**Table S9.**  $^1\text{H}$ -NMR spectrum of 9S,10S-*trans*-epoxy-11S-*erythro*-hydroxy-octadec-12Z-enoate methyl ester.

**Table S10.**  $^1\text{H}$ -NMR spectrum of 9S,10S-*trans*-epoxy-11R-*threo*-hydroxy-octadec-12Z-enoate methyl ester.

and

Assignment of *erythro* versus *threo* 9,10-*trans*-epoxy-11-hydroxy-octadecenoates.

**Table S1. <sup>1</sup>H NMR of 9(S),10(S),13(S)-trihydroxyoctadecenoate methyl ester, DMP derivative.** The spectrum (600MHz) was acquired at room temperature in d<sub>6</sub>-benzene solvent. Trihydroxy I is generated from the acid hydrolysis of 9(S),10(S)-epoxy-13(S)-hydroxyoctadecenoic acid.

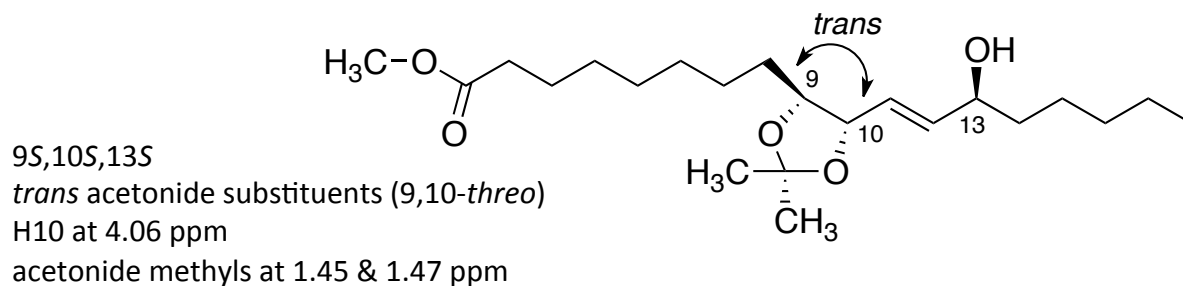

| Chemical shift (ppm) | Multiplicity | Assignment, coupling constant                            |
|----------------------|--------------|----------------------------------------------------------|
| 5.76                 | dd           | H12 $J_{11,12}=15.5\text{Hz}$ , $J_{12,13}=5.5\text{Hz}$ |
| 5.69                 | dd           | H11 $J_{11,12}=15.5\text{Hz}$ , $J_{10,11}=6.8\text{Hz}$ |
| 4.06                 | dd           | H10 $J_{10,11}=7.5\text{Hz}$ , $J_{9,10}=7.7\text{Hz}$   |
| 3.91                 | m            | H9                                                       |
| 3.72                 | m            | H13                                                      |
| 3.35                 | s            | -OCH <sub>3</sub>                                        |

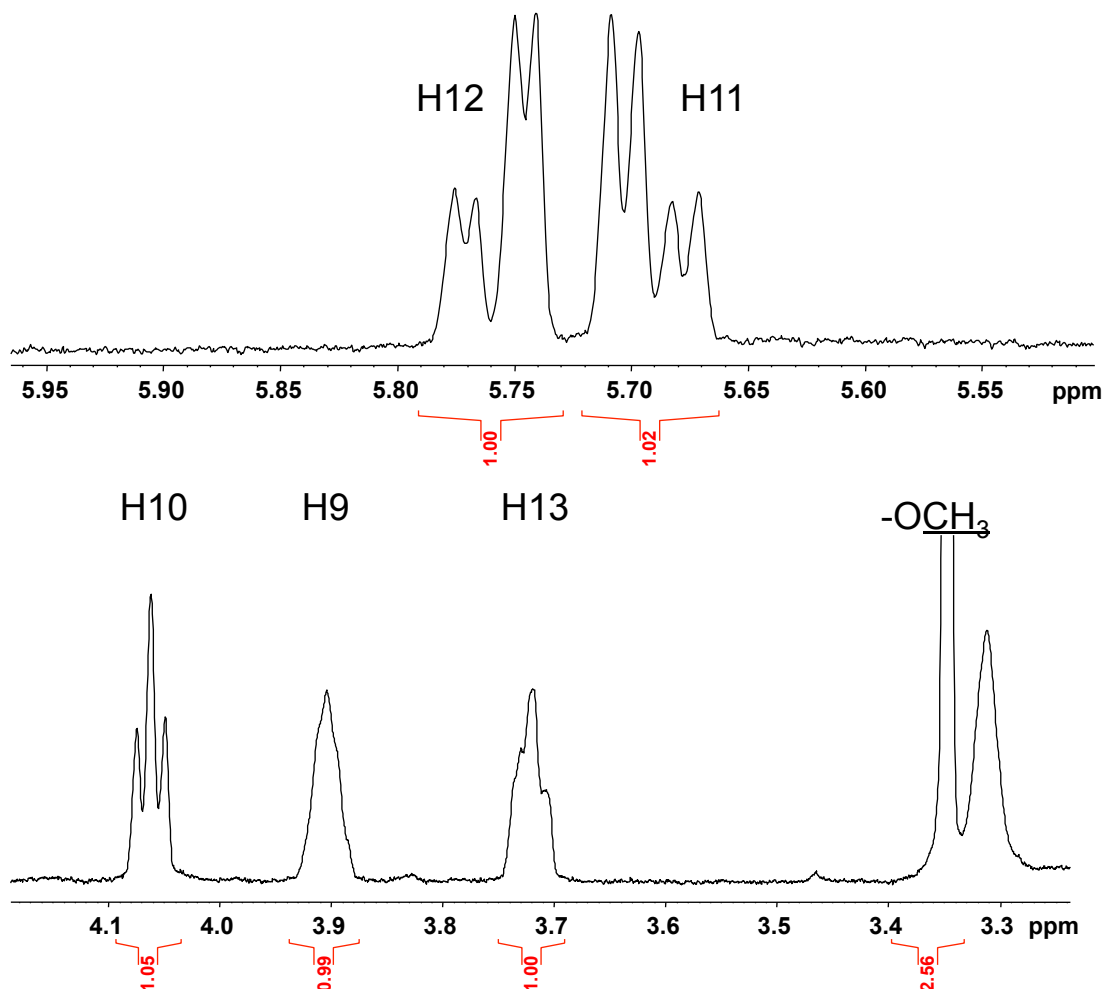

**Table S2.  $^1\text{H}$  NMR spectrum of 9(*S*),12(*R*),13(*S*)-trihydroxyoctadecenoate methyl ester, DMP derivative.** The spectrum (600MHz) was acquired at room temperature in  $d_6$ -benzene solvent. Trihydroxy **IIa** is generated from the acid hydrolysis of 9(*S*),10(*S*)-epoxy, 13(*S*)-hydroxyoctadecenoic acid.

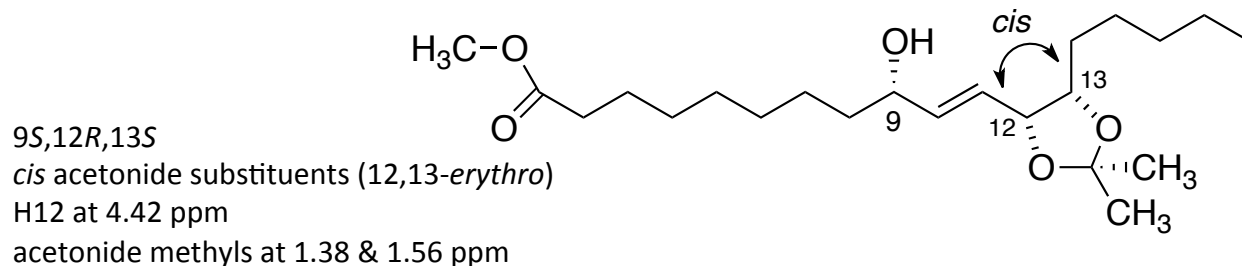

| Chemical shift (ppm) | Multiplicity | Assignment, coupling constant                            |
|----------------------|--------------|----------------------------------------------------------|
| 5.68                 | dd           | H10 $J_{10,11}=15.5\text{Hz}$ , $J_{9,10}=7.4\text{Hz}$  |
| 5.62                 | dd           | H11 $J_{10,11}=15.5\text{Hz}$ , $J_{11,12}=6.1\text{Hz}$ |
| 4.42                 | dd           | H12 $J_{11,12}=6.8\text{Hz}$ , $J_{12,13}=6.8\text{Hz}$  |
| 4.02                 | m            | H13                                                      |
| 3.87                 | m            | H9                                                       |
| 3.35                 | s            | -OCH <sub>3</sub>                                        |

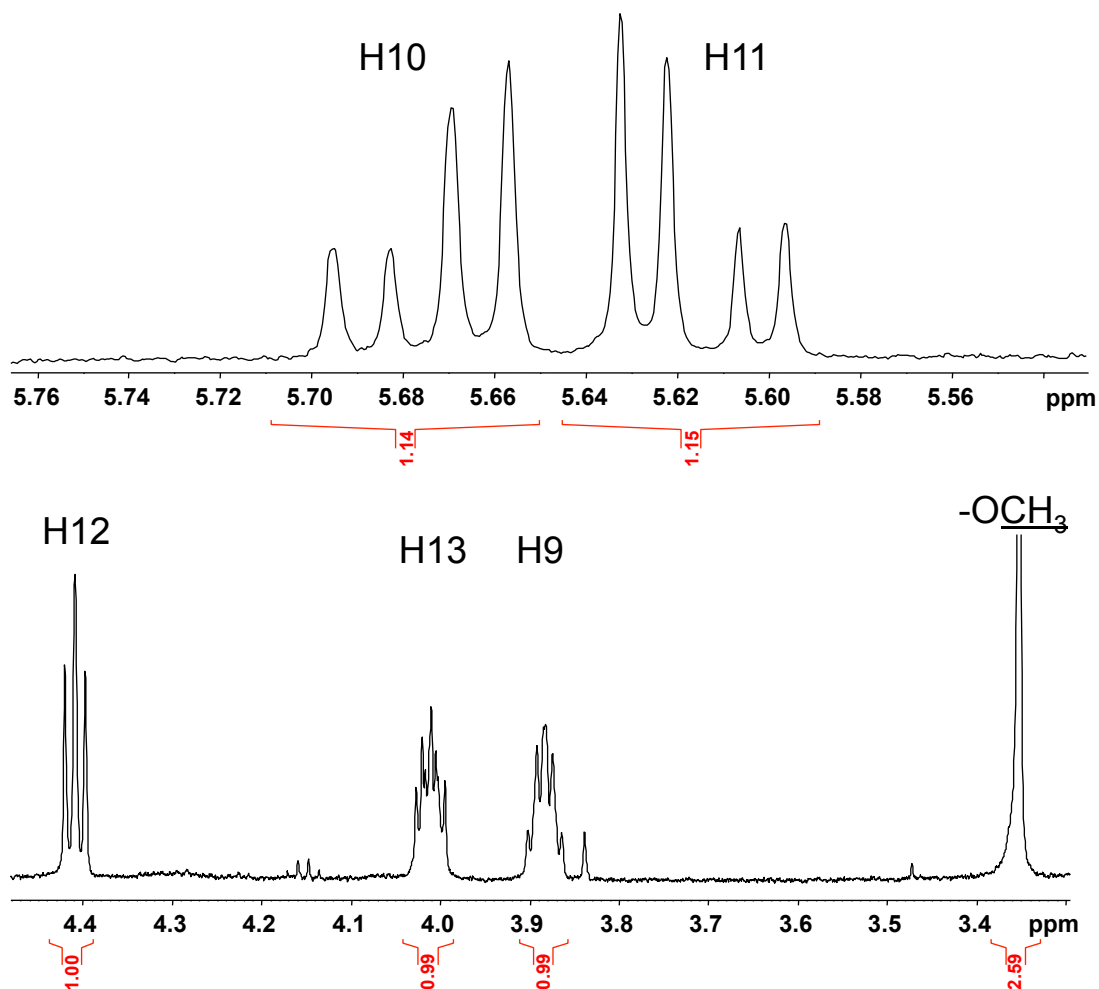

**Table S3.  $^1\text{H}$  NMR spectrum of 9(*S*),10(*R*),13(*S*)-trihydroxyoctadecenoate methyl ester, DMP derivative.** The spectrum (600MHz) was acquired at room temperature in  $d_6$ -benzene solvent. Trihydroxy IIb is generated from the acid hydrolysis of 9(*S*),10(*S*)-epoxy, 13(*S*)-hydroxyoctadecenoic acid.

9*S*,10*R*,13*S*  
*cis* acetonide substituents (9,10-*erythro*)  
 H10 at 4.42 ppm  
 acetonide methyls at 1.38 & 1.56 ppm

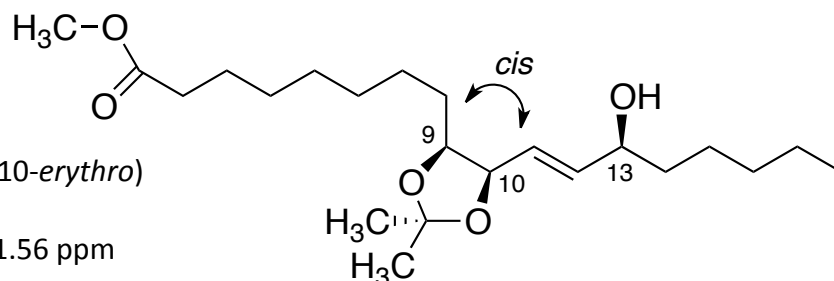

| Chemical shift (ppm) | Multiplicity | Assignment, coupling constant                            |
|----------------------|--------------|----------------------------------------------------------|
| 5.68                 | dd           | H12 $J_{11,12}=15.8\text{Hz}$ , $J_{12,13}=7.6\text{Hz}$ |
| 5.62                 | dd           | H11 $J_{11,12}=15.4\text{Hz}$ , $J_{10,11}=5.8\text{Hz}$ |
| 4.42                 | dd           | H10 $J_{10,11}=6.7\text{Hz}$ , $J_{9,10}=7.0\text{Hz}$   |
| 4.01                 | m            | H9                                                       |
| 3.90                 | m            | H13                                                      |
| 3.35                 | s            | -OCH <sub>3</sub>                                        |

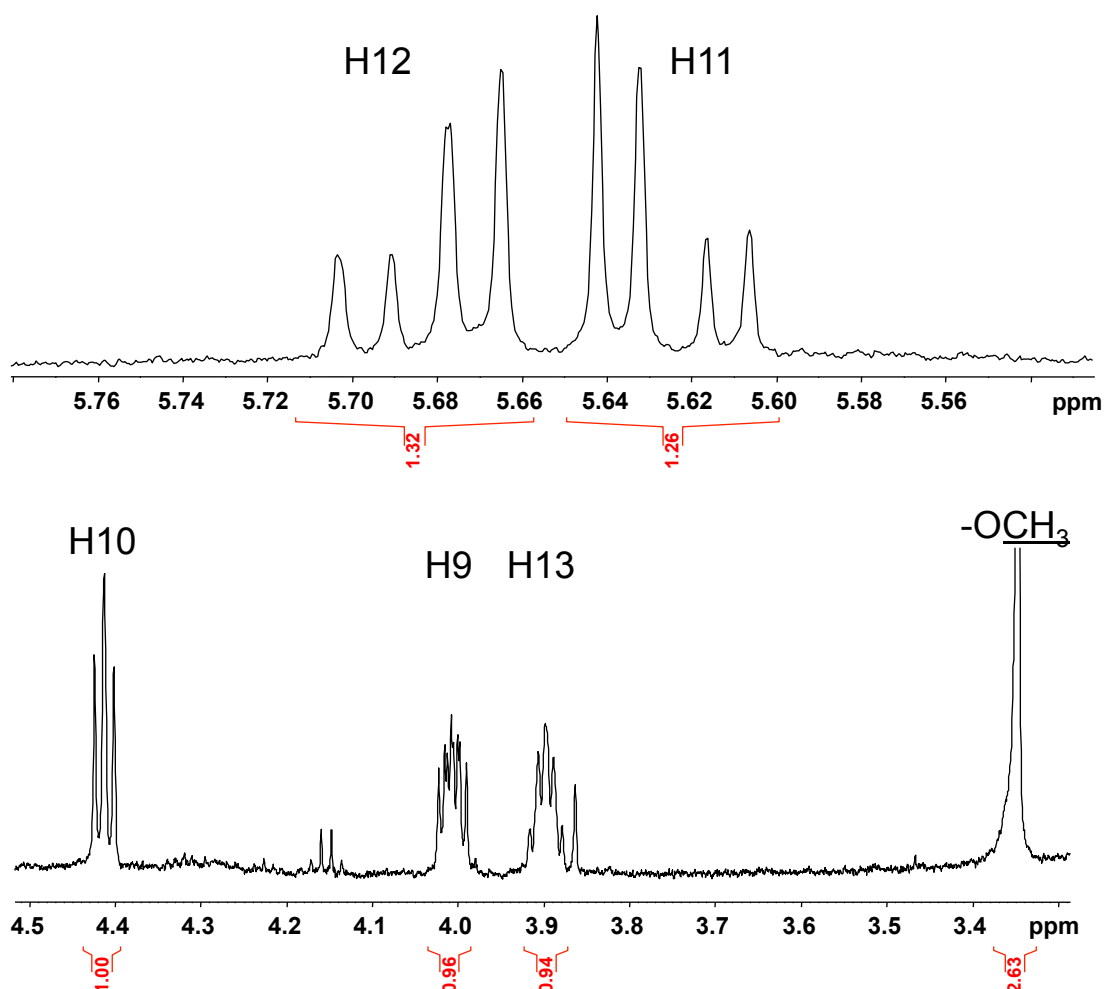

**Table S4.  $^1\text{H}$  NMR spectrum of 9(S),12(S),13(S)-trihydroxyoctadecenoate (pinellic acid) methyl ester, DMP derivative.** The spectrum (600MHz) was acquired at room temperature in  $d_6$ -benzene solvent. Trihydroxy III is generated from the acid hydrolysis of 9(S),10(S)-epoxy-13(S)-hydroxyoctadecenoic acid.

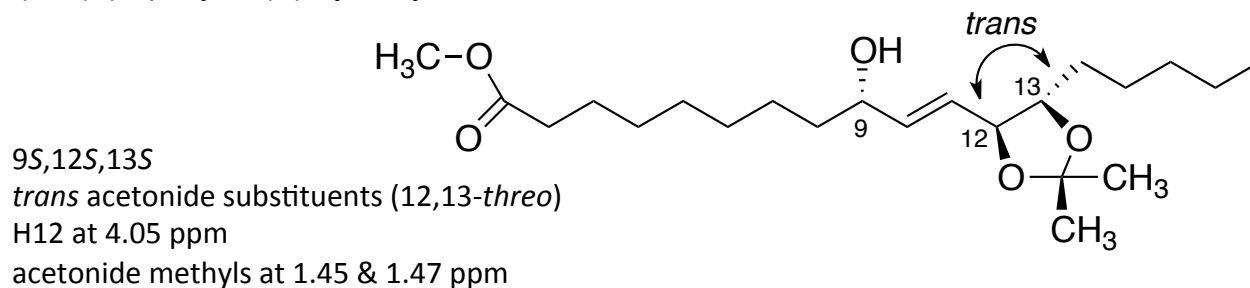

| Chemical shift (ppm) | Multiplicity | Assignment, coupling constant                            |
|----------------------|--------------|----------------------------------------------------------|
| 5.75                 | dd           | H10 $J_{10,11}=15.5\text{Hz}$ , $J_{9,10}=5.5\text{Hz}$  |
| 5.68                 | dd           | H11 $J_{10,11}=15.5\text{Hz}$ , $J_{11,12}=6.8\text{Hz}$ |
| 4.06                 | dd           | H12 $J_{11,12}=7.6\text{Hz}$ , $J_{12,13}=7.6\text{Hz}$  |
| 3.88                 | m            | H13                                                      |
| 3.73                 | m            | H9                                                       |
| 3.35                 | s            | -OCH <sub>3</sub>                                        |

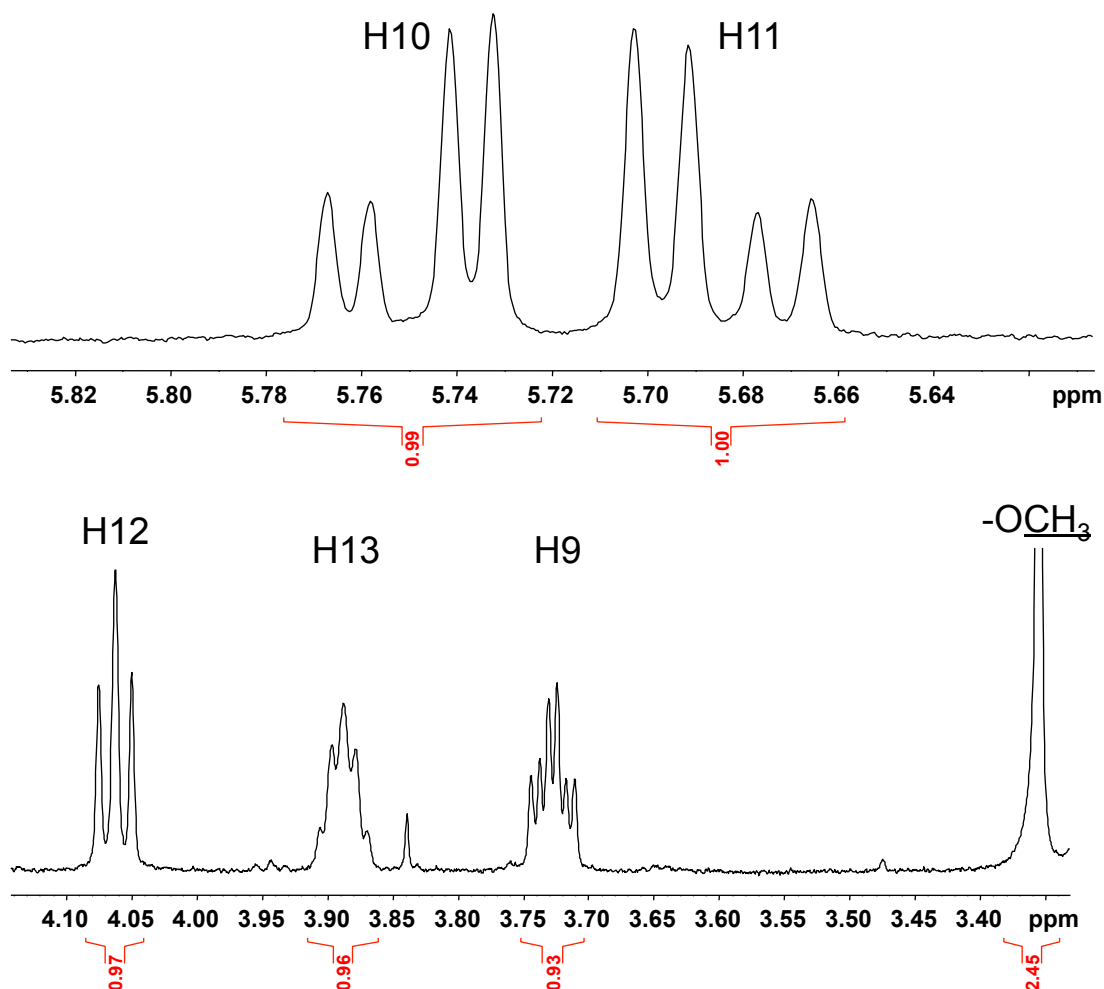

**Table S5.  $^1\text{H}$  NMR spectrum of 9(*S*),12(*S*),13(*S*)-trihydroxyoctadecenoate methyl ester, DMP derivative.** The spectrum (600MHz) was acquired at room temperature in  $d_6$ -benzene solvent. Pinellic acid is generated from the incubation of 9(*S*)-HPODE with beetroot extract.

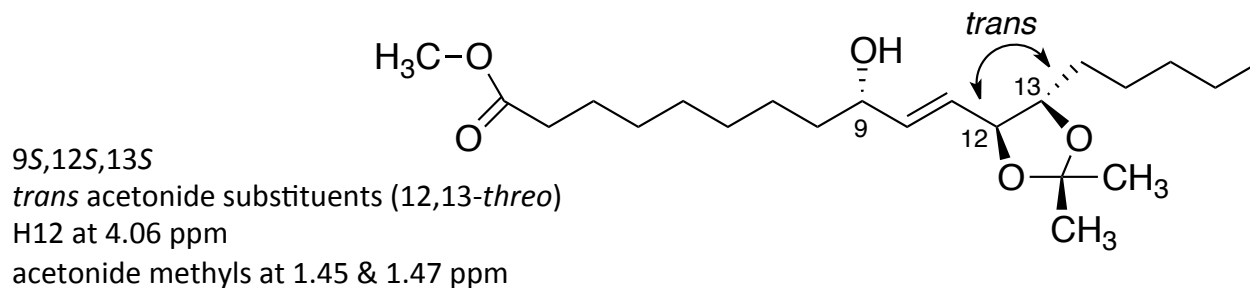

| Chemical shift (ppm) | Multiplicity | Assignment, coupling constant                                                            |
|----------------------|--------------|------------------------------------------------------------------------------------------|
| 5.75                 | ddd          | H10 $J_{10,11}=15.5\text{Hz}$ , $J_{9,10}=5.5\text{Hz}$ , $J_{10,12} = 0.3\text{Hz}$     |
| 5.68                 | ddd          | H11 $J_{10,11} = 15.5\text{Hz}$ , $J_{11,12} = 6.9\text{Hz}$ , $J_{9,11} = 0.9\text{Hz}$ |
| 4.06                 | dd           | H12 $J_{11,12} = 7.3\text{Hz}$ , $J_{12,13} = 7.1\text{Hz}$                              |
| 3.89                 | m            | H13                                                                                      |
| 3.72                 | m(dt)        | H9                                                                                       |
| 3.36                 | s            | -OCH <sub>3</sub>                                                                        |

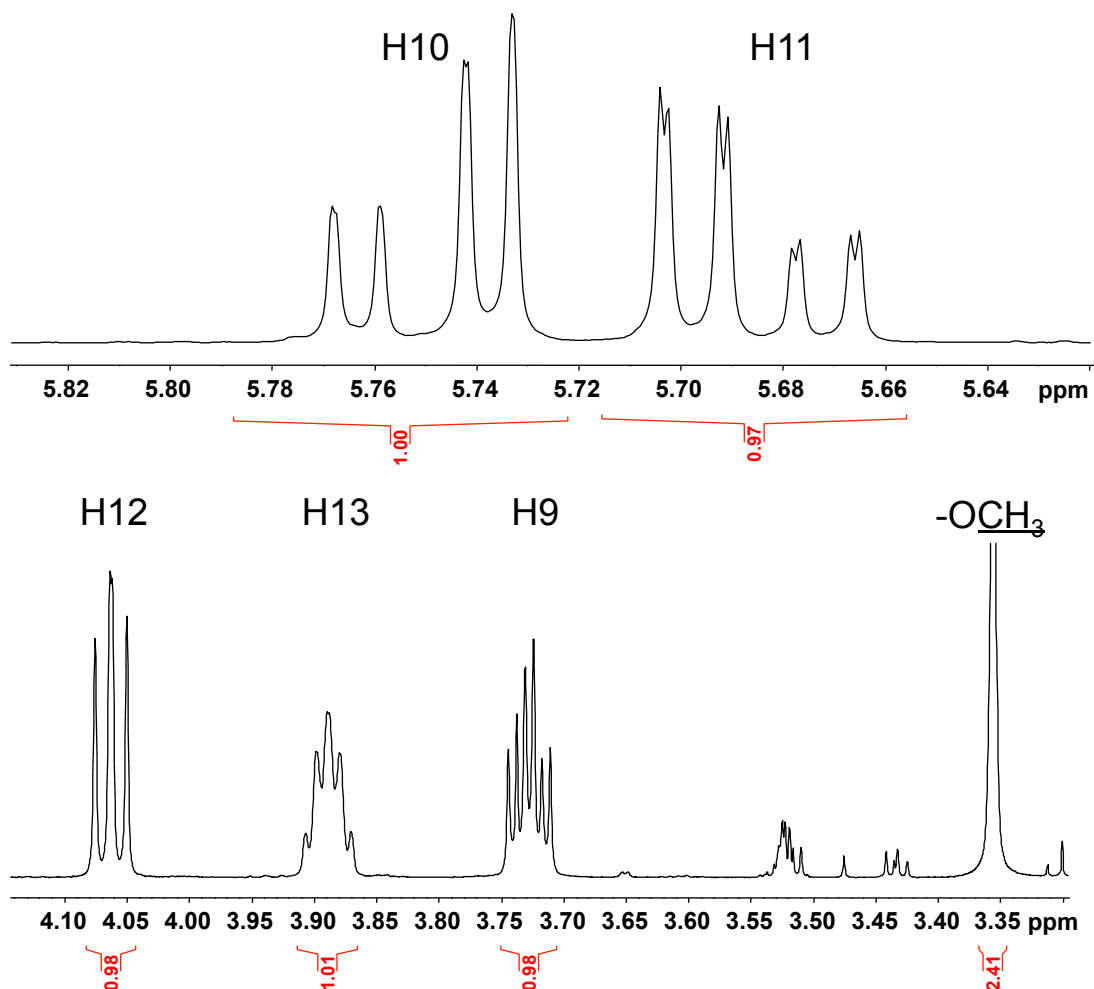

**Table S6. <sup>1</sup>H NMR spectrum of 9(*R*)-hydroxy-12(*R*),13(*S*)-epoxy-octadecenoate methyl ester.** The spectrum (600MHz) was acquired at room temperature in d<sub>6</sub>-benzene solvent. The epoxyhydroxy is generated from the short duration incubation of 9(*R*)-HPODE with beetroot extract.

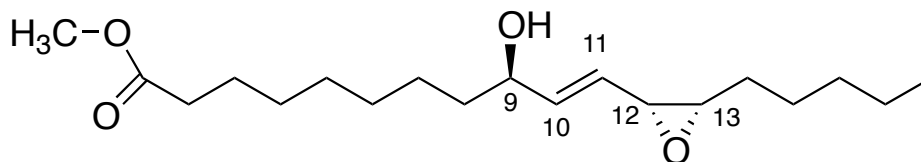

| Chemical shift (ppm) | Multiplicity | Assignment, coupling constant                                                       |
|----------------------|--------------|-------------------------------------------------------------------------------------|
| 5.79                 | dd           | H12 $J_{11,12}=15.5\text{Hz}$ , $J_{12,13}=5.8\text{Hz}$                            |
| 5.58                 | ddd          | H11 $J_{11,12}=15.5\text{Hz}$ , $J_{10,11}=7.4\text{Hz}$ , $J_{11,13}=1.3\text{Hz}$ |
| 3.86                 | m            | H13                                                                                 |
| 3.35                 | s            | -OCH <sub>3</sub>                                                                   |
| 3.25                 | dd           | H10 $J_{10,11}=7.2\text{Hz}$ , $J_{9,10}=4.4\text{Hz}$                              |
| 2.86                 | m            | H9                                                                                  |
| 2.09                 | t            | H2                                                                                  |

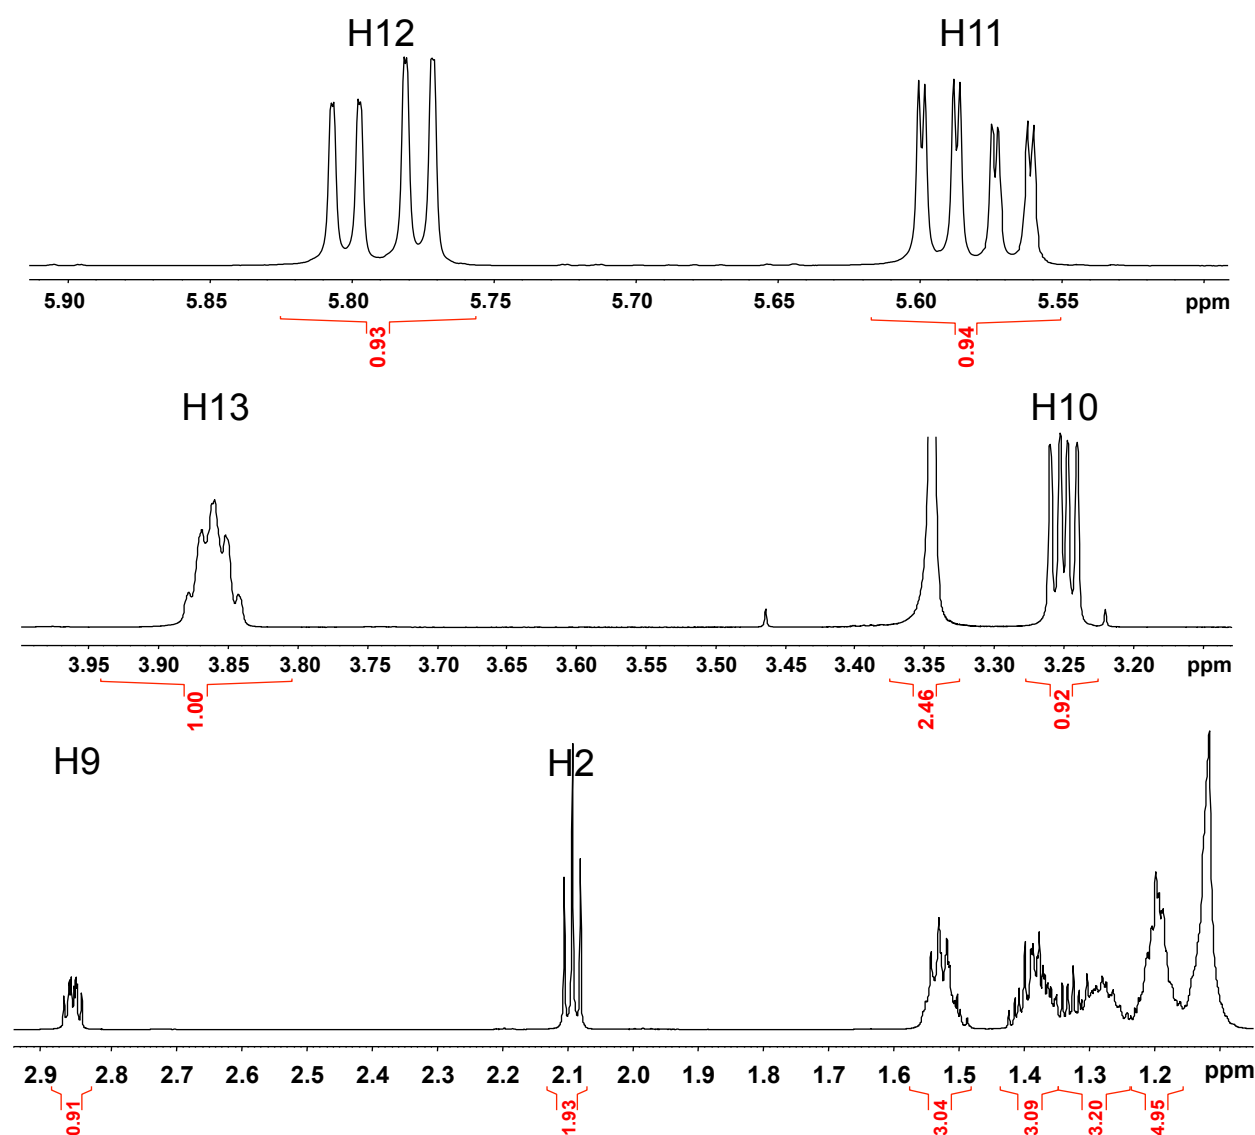

**Table S7.  $^1\text{H}$  NMR spectrum of 9(*R*),12(*S*),13(*S*)-trihydroxyoctadecenoate methyl ester, DMP derivative.** The spectrum (600MHz) was acquired at room temperature in  $d_6$ -benzene solvent. The trihydroxy is generated from the incubation of 9(*R*)-HPODE with beetroot extract.

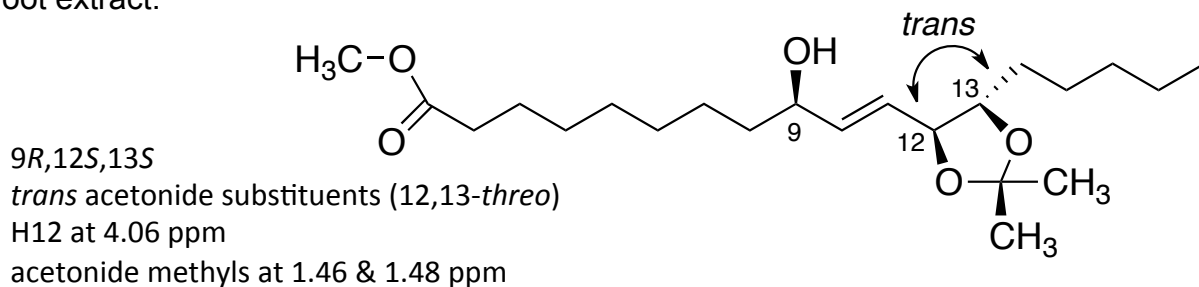

| Chemical shift (ppm) | Multiplicity | Assignment, coupling constant                            |
|----------------------|--------------|----------------------------------------------------------|
| 5.73                 | dd           | H10 $J_{10,11}=15.6\text{Hz}$ , $J_{9,10}=5.8\text{Hz}$  |
| 5.66                 | dd           | H11 $J_{10,11}=16.3\text{Hz}$ , $J_{11,12}=6.9\text{Hz}$ |
| 4.06                 | dd           | H12 $J_{11,12}=7.3\text{Hz}$ , $J_{12,13}=7.3\text{Hz}$  |
| 3.87                 | m            | H13                                                      |
| 3.72                 | m(dt)        | H9                                                       |
| 3.36                 | s            | -OCH <sub>3</sub>                                        |

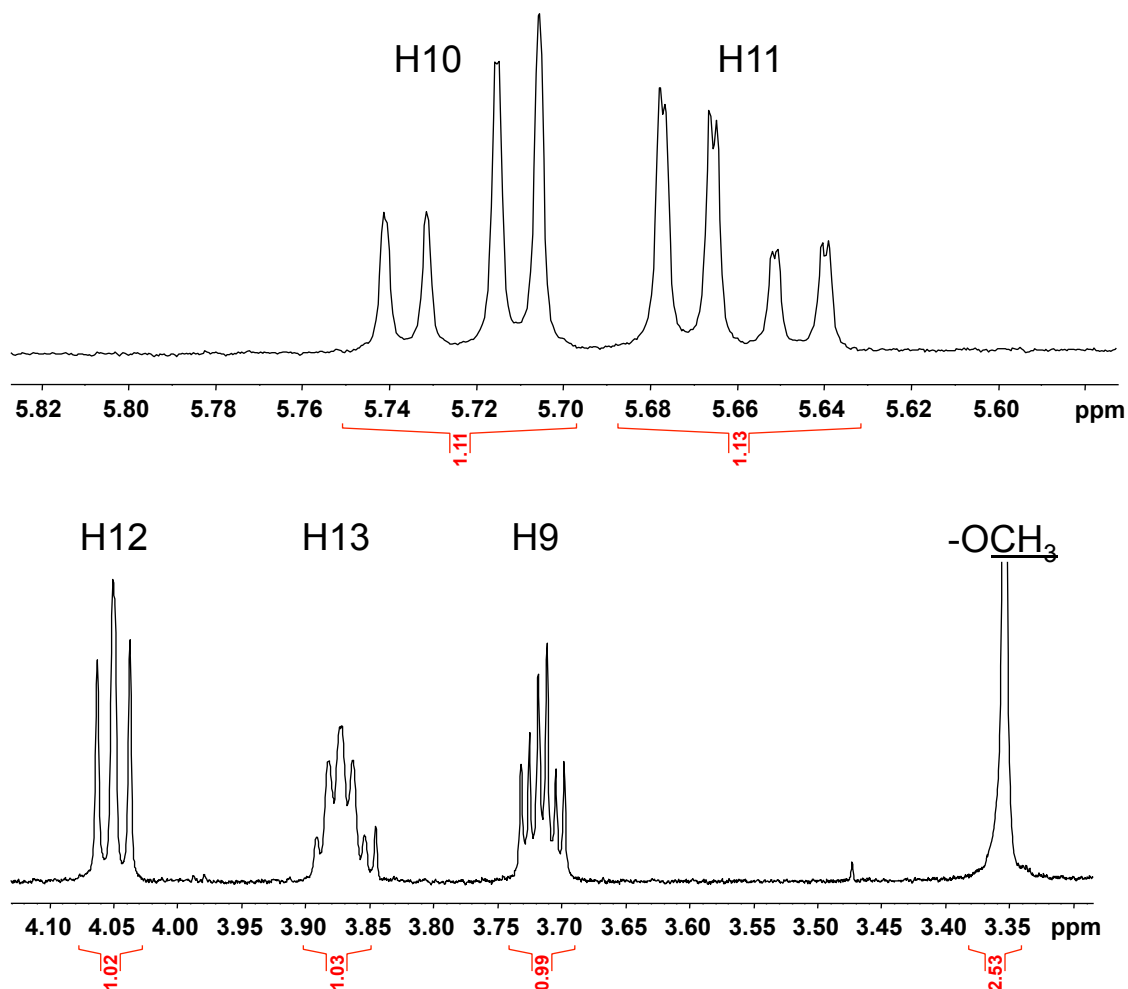



**Table S8.**  $^1\text{H}$  NMR spectrum of 9(*S*)-hydroxy,11-*trans*-13-ketooctadecenoic methyl ester. The spectrum (600MHz) was acquired at room temperature in  $d_6$ -benzene solvent. The  $\delta$ -ketol by-product is generated during the acid hydrolysis of 9(*S*),10(*S*)-*trans*-epoxy-13(*S*)-hydroxyoctadecenoic acid.

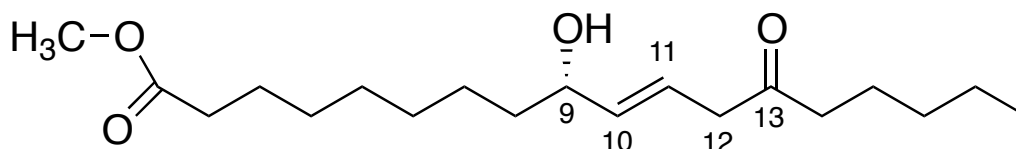

| Chemical shift (ppm) | Multiplicity | Assignment, coupling constant                                                            |
|----------------------|--------------|------------------------------------------------------------------------------------------|
| 5.74                 | dt           | H11 $J_{10,11} = 15.5\text{Hz}$ , $J_{11,12} = 7.0\text{Hz}$ , $J_{9,11} = 1.1\text{Hz}$ |
| 5.40                 | dd           | H10 $J_{10,11} = 15.5\text{Hz}$ , $J_{9,10} = 6.6\text{Hz}$ , $J_{10,12} = 1.7\text{Hz}$ |
| 3.87                 | m            | H9                                                                                       |
| 2.73                 | d            | H12 $J_{11,12} = 7.0\text{Hz}$                                                           |

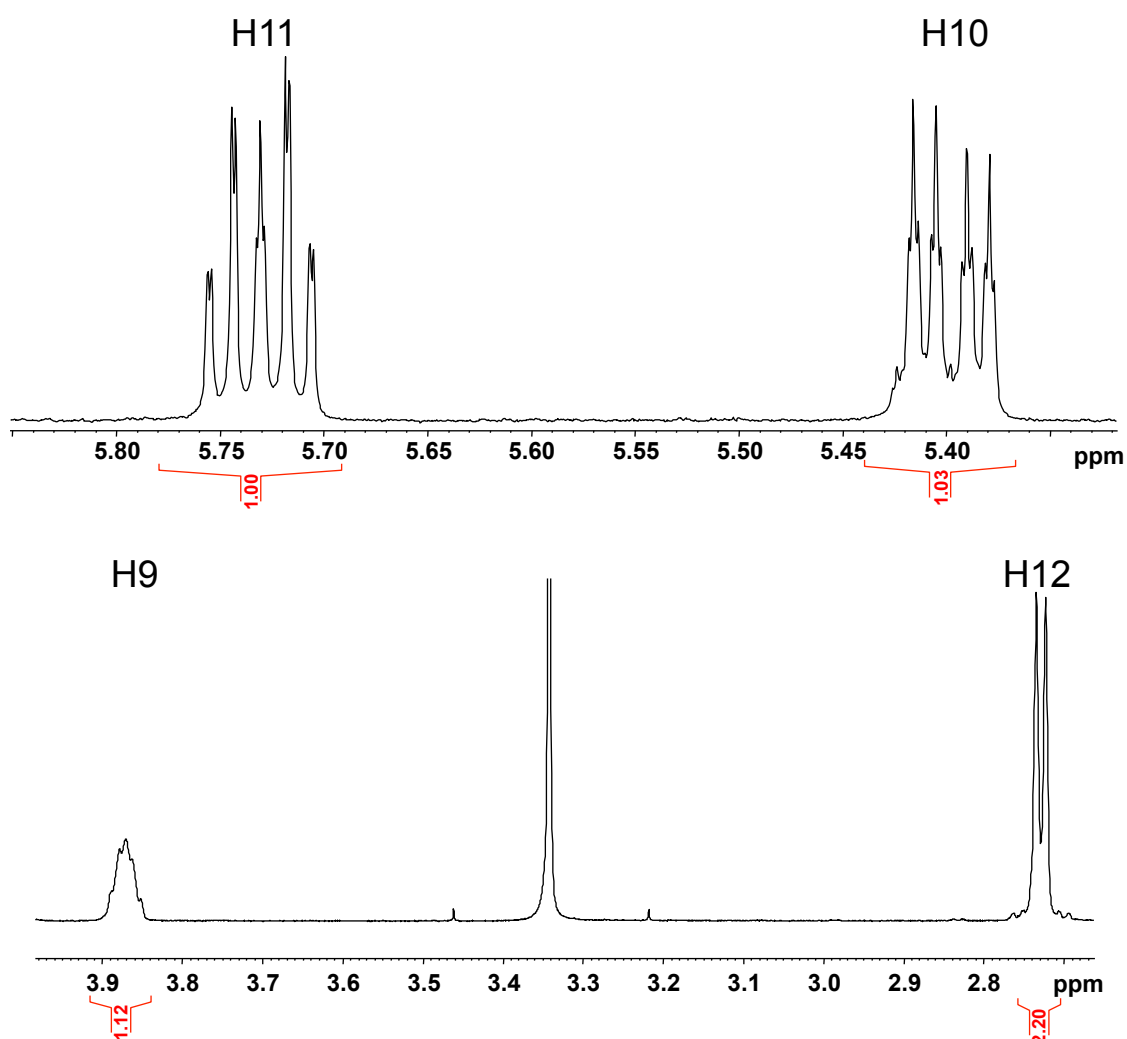

**Table S9 . <sup>1</sup>H-NMR spectrum of 9S,10S-trans-epoxy-11S-erythro-hydroxy-octadec-12Z-enoate methyl ester.** The spectrum (600MHz) was acquired at room temperature in d6- benzene solvent.

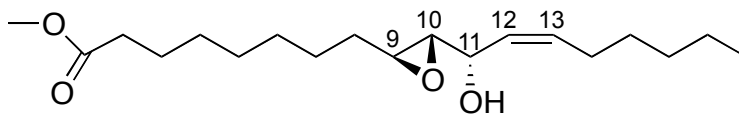

| Chemical shift (ppm) | Multiplicity | Assignment, coupling constant                                                        |
|----------------------|--------------|--------------------------------------------------------------------------------------|
| 5.45-5.52            | dd/dt (m)    | H12,13 $J_{12,13}=11.1\text{Hz}$                                                     |
| 4.54                 | (dt) ddd     | H11 $J_{-OH,11} \approx J_{10,11} = 2.5\text{-}3\text{Hz}, J_{11,12} = 6.7\text{Hz}$ |
| 3.35                 | s            | -OCH <sub>3</sub>                                                                    |
| 2.94                 | dt           | H9 $J_{8,9} = 5.6\text{Hz}, J_{9,10} = 2.2\text{Hz}$                                 |
| 2.69                 | dd           | H10 $J_{9,10} = 2.2\text{Hz}, J_{10,11} = 3.12\text{Hz}$                             |
| 2.09                 | t            | H2 $J_{2,3} = 7.5\text{Hz}$                                                          |
| 1.94                 | m            | H14                                                                                  |
| 1.63                 | d            | 11-OH $J = 2.5\text{Hz}$                                                             |
| 1.52                 | p            | H3                                                                                   |

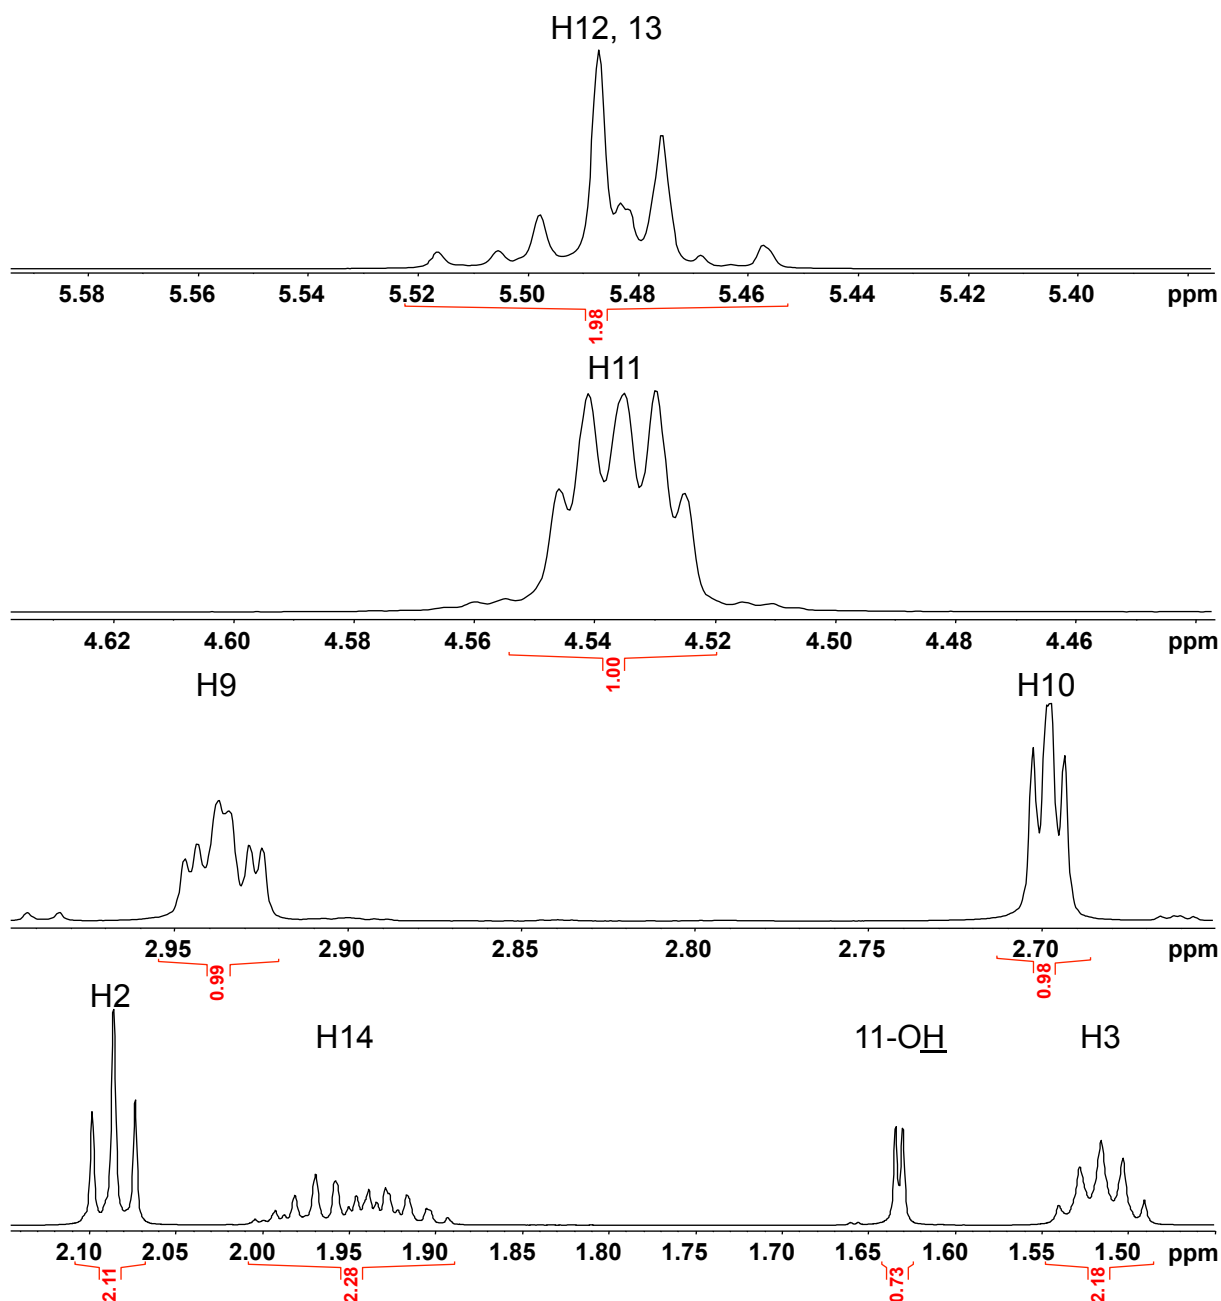

**Table S10 . <sup>1</sup>H-NMR spectrum of 9*S*,10*S*-*trans*-epoxy-11*R*-*threo*-hydroxy-octadec-12*Z*-enoate methyl ester.** The spectrum (600MHz) was acquired at room temperature in d<sub>6</sub>- benzene solvent.

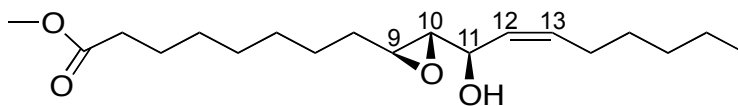

| Chemical shift (ppm) | Multiplicity                   | Assignment, coupling constant                                                         |
|----------------------|--------------------------------|---------------------------------------------------------------------------------------|
| 5.54                 | dd (+ 1.5 Hz allylic coupling) | H12 $J_{11,12}=8.6\text{Hz}$ , $J_{12,13}=11.0\text{Hz}$                              |
| 5.44                 | dt                             | H13 $J_{12,13}=11.0\text{Hz}$ , $J_{13,14}=7.5\text{Hz}$                              |
| 4.25                 | (dt) ddd                       | H11 $J_{\text{-OH},11} \approx J_{10,11} = 5.2\text{Hz}$ , $J_{11,12} = 8.6\text{Hz}$ |
| 3.35                 | s                              | -OCH <sub>3</sub>                                                                     |
| 2.82                 | dt                             | H9 $J_{8,9} = 5.6\text{Hz}$ , $J_{9,10} = 2.2\text{Hz}$                               |
| 2.71                 | dd                             | H10 $J_{9,10} = 2.2\text{Hz}$ , $J_{10,11} = 5.2\text{Hz}$                            |
| 2.09                 | t                              | H2 $J_{2,3} = 7.5\text{Hz}$                                                           |
| 1.94                 | m                              | H14                                                                                   |
| 1.62                 | d                              | 11-OH $J = 5.2\text{Hz}$                                                              |
| 1.52                 | p                              | H3                                                                                    |

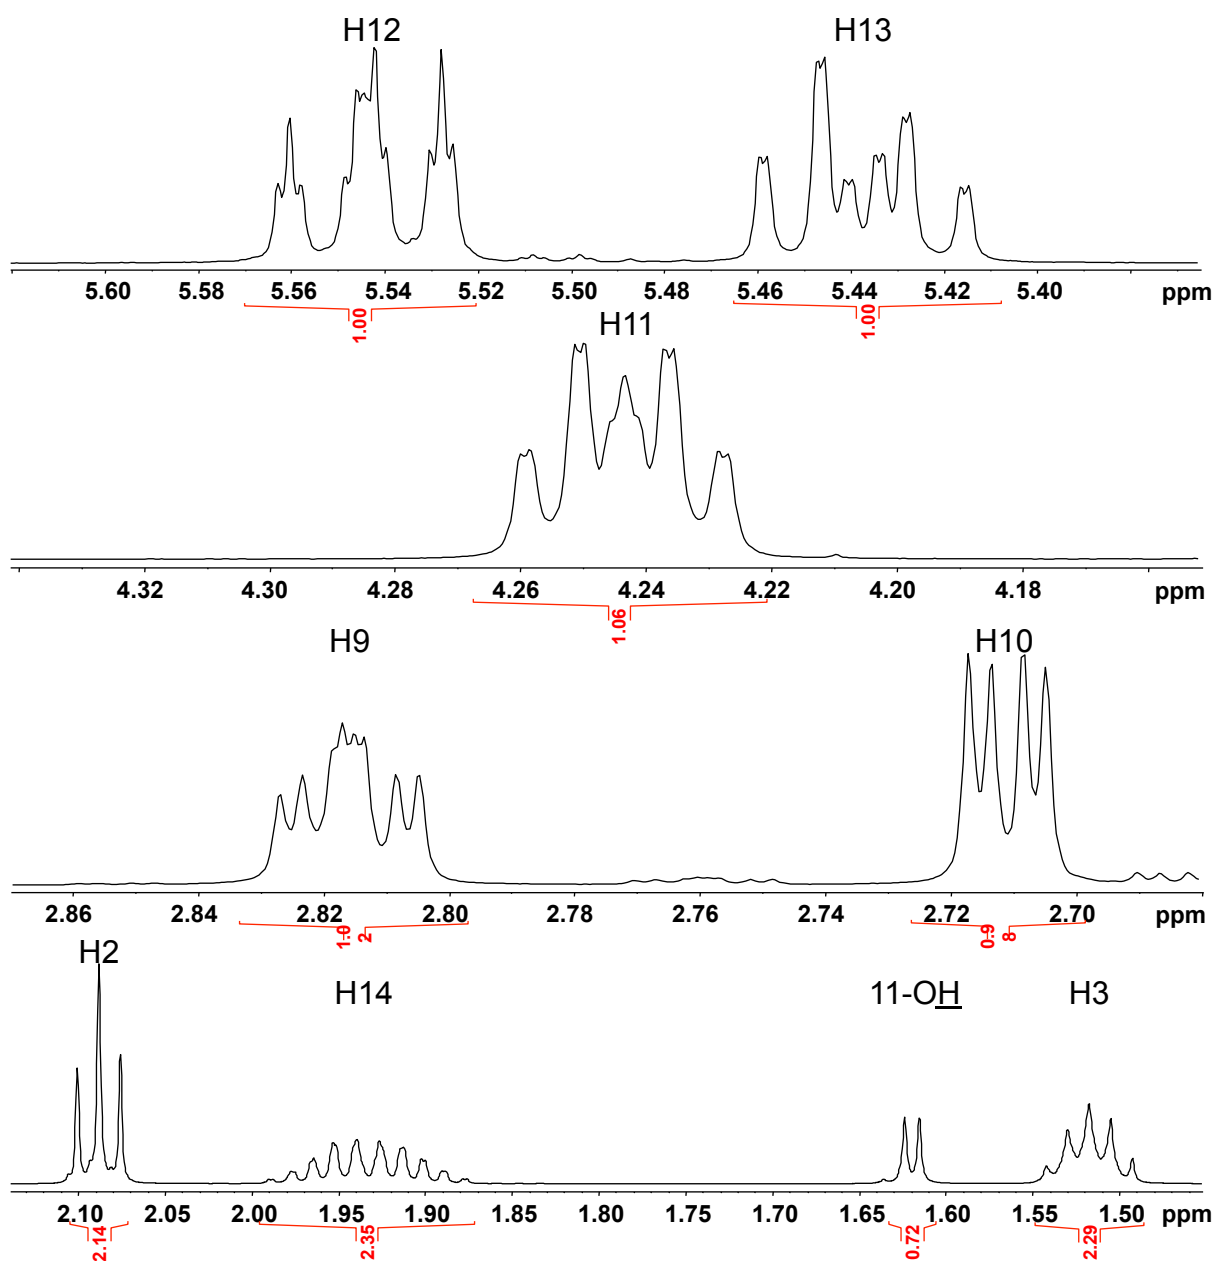

### Assignment of *erythro* versus *threo* 9,10-*trans*-epoxy-11-hydroxy-octadecenoates.

COSY analysis confirmed the overall structures for the two diastereomers in Supplementary Tables S9 and S10 as 9,10-epoxy-11-hydroxy-octadec-12Z-enoates. In both diastereomers, the coupling constant for the epoxide protons,  $J = 2.2$  Hz, established the *trans* epoxide configuration. The *erythro* versus *threo* assignment is confirmed on the basis of three criteria (Bernart and Gerwick, 1994):

1) According to precedents for *erythro* and *threo* epoxyalcohols of this type, the mobility of the two diastereomers on silica (SP-HPLC or TLC) is in the order of the more mobile *erythro* followed by *threo* (Corey and Mehrotra, 1983; Corey et al., 1983; Dix and Marnett, 1985; Gardner and Crawford, 1981; Vasiljeva et al., 1993). Our *erythro* product eluted at 9.3 min on SP-HPLC (Fig. 1A, main text), while the *threo* diastereomer eluted later at 11 min (co-chromatographing with the first of the allylic epoxyalcohols (i.e. 9S,10S-*cis*-epoxy-10E-13-hydroxy-octadecenoate).

2) The  $\alpha$ -hydroxy proton in the *erythro* isomer is the further downfield. We observed values of 4.535 ppm (*erythro*) and 4.35 ppm (*threo*).

3) The  $^1\text{H-NMR}$  coupling constant for the 10-epoxide and 11-hydroxyl protons should be  $\sim 3.2$  Hz for the *erythro* isomer (observed here as  $J_{10,11} = 3.1$  Hz, Fig. S9) and at least 5 Hz for *threo* ( $J_{10,11} = 5.2$  Hz, Table S10) (Mercier and Agoh, 1974).

### REFERENCES

- Bernart, M. W., and Gerwick, W. H. (1994). Eicosanoids from the tropical red alga *Murrayella pericladus*. *Phytochemistry* **36**, 1233-1240.
- Corey, E. J., and Mehrotra, M. M. (1983). Stereochemistry of the lipoxygenase-catalyzed allylic hydroperoxide to oxiranylcarbinol rearrangement. *Tetrahedron. Lett.* **45**, 4921-4922.
- Corey, E. J., Mehrotra, M. M., and Cashman, J. R. (1983). New synthetic routes to leukotrienes and other arachidonate derived epoxy eicosatetraenoic acids (EPETE's) - Exclusion of the hydroxy epoxide pathway for leukotriene biosynthesis. *Tetrahedron Lett.* **24**, 4917-4920.
- Dix, T. A., and Marnett, L. J. (1985). Conversion of linoleic acid hydroperoxide to hydroxy, keto, epoxyhydroxy, and trihydroxy fatty acids by hematin. *J. Biol. Chem.* **260**, 5351-5357.
- Gardner, H. W., and Crawford, C. G. (1981). Degradation of linoleic acid hydroperoxides by a cysteine-FeCl<sub>3</sub> catalyst as a model for similar biochemical reactions. 3. A novel product, *trans*-12,13-epoxy-11-oxo-*trans*-9-octadecenoic acid, from 13-L(S)-hydroperoxy-*cis*-9,*trans*-11-octadecadienoic acid. *Biochim. Biophys. Acta* **665**, 126-133.
- Mercier, J., and Agoh, B. (1974). Comportement d'hydroperoxydes allyliques a longue chaine en presence de complexes de certains metaux de transition. II. Structure des epoxy-alcools formés a partir d'hydroperoxydes d'octadécène-9 oates de méthyle *cis* et *trans* en présence d'acétylacétonate de vanadyle. *Chem. Phys. Lipids* **12**, 239-248.
- Vasiljeva, L. L., Manukina, T. A., Demin, P. M., Lapitskaja, M. A., and Pivnitsky, K. K. (1993). Synthetic study of hepoxilins. 3. Synthesis, properties, and identification of epimeric hepoxilins (-)-(10R)-B<sub>3</sub> and (+)-(10S)-B<sub>3</sub>. *Tetrahedron* **49**, 4099-4106.
